# Supplementary material for: DNA Methylation in INA, NHLH2, and THBS4 Is Associated with Metastatic Disease in Renal Cell Carcinoma
Source: MDPI journal article supplement (doi:10.3390/cancers14010039), 2021-12-22
Supplement: s1 [file s1]

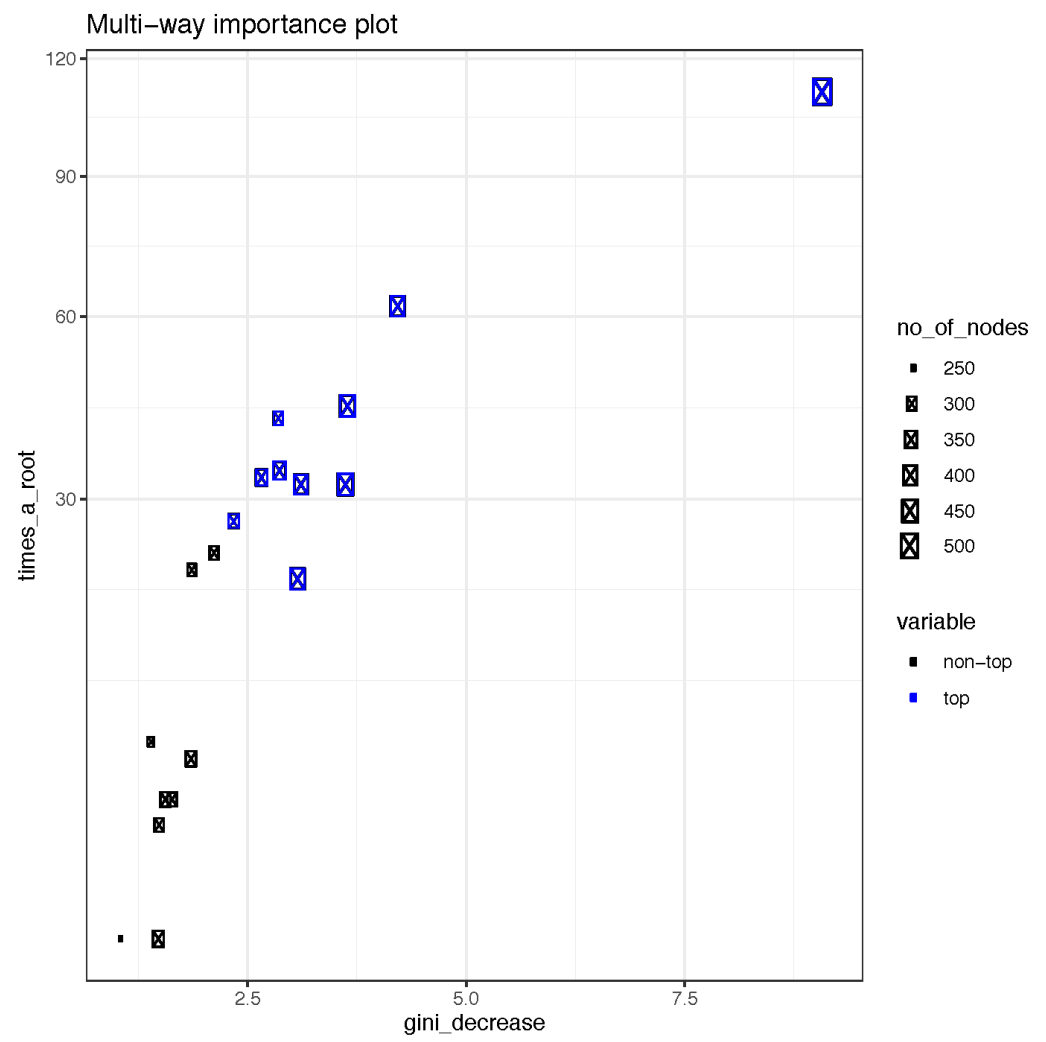

**Figure S1.** Variable of importance analysis of the random forest classification of tissue samples.

**Supplemental Table S1. Primer Sequences, Sequence to analyse and genomic position of analysed region by pyrosequencing**

| Gene         | Primer Sequences              |                              |                                        | Chromosome | Genomic position |             | Sequence to analyze                                                             | Coordinates in UCSC table browser |
|--------------|-------------------------------|------------------------------|----------------------------------------|------------|------------------|-------------|---------------------------------------------------------------------------------|-----------------------------------|
|              | Sequencing                    | Forward                      | Reverse                                |            | Genomic Start    | Genomic End |                                                                                 |                                   |
| <i>INA</i>   | AAACCCAAATCAA<br>ATCTAATTTAAC | AGGAGGTAGTAGA<br>GTTGTTGGTTA | TCTCCCTCAAAC<br>CCAAATCAAATCTA<br>ATT  | 10         | 105037678        | 105037737   | CACAATCACRTCCACCTCRAC<br>CRCRACCTACRACRACRCCT<br>ACAACRTAACCAACAACCTC           | chr10:105037678-105037737         |
| <i>NHLH2</i> | GGGAAGGTTTTTT<br>GGAT         | GTTGGGGGAGGG<br>AAGGTT       | AACTCCCCCACCT<br>TTATTTAATCATTT<br>CTT | 1          | 116381641        | 116381682   | TTTTYGYGTTTTTTYGAAATYG<br>TAAAGAAATGATTAAATAAA                                  | chr1:116381641-116381682          |
| <i>THBS4</i> | GGGGTGGGTGTA<br>GATA          | GAGGATGGGAAG<br>GAGTTTG      | TCTCCCCTATAATC<br>TCTACTCAAC           | 5          | 79330905         | 79330970    | YGGTTTTYGAYGYGYGAGGGT<br>AGGGGYGAAGATGGGTAGTY<br>GGGGTTGGAGAGAAAGGGGT<br>GTTGAG | chr5:79330905-79330970            |
